# Supplementary material for: Super-hydrophobic surfaces to condensed micro-droplets at temperatures below the freezing point retard ice/frost formation
Source: Royal Society of Chemistry journal article supplement (doi:10.1039/c0sm01504k), 2011-01-01
Supplement: c0sm01504k.pdf [file c0sm01504k.pdf]

## Super-hydrophobic Surfaces to Condensed Micro-droplets at Temperatures below the Freezing Point Retard IceFrost FormationMin

Min He<sup>1</sup>, Jianjun Wang<sup>1\*</sup>, Huiling Li<sup>1</sup>, Yanlin Song<sup>1,2\*</sup>

1 Beijing National Laboratory For Molecular Sciences (BNLMS), Laboratory of New Materials, Institute of Chemistry, Chinese Academy of Sciences, Beijing 100190, P. R. China.

2 Key Laboratory of Organic Solids, Institute of Chemistry, Chinese Academy of Sciences, Beijing 100190, P. R. China.

Corresponding E-mail: wangj220@iccas.ac.cn; ylsong@iccas.ac.cn

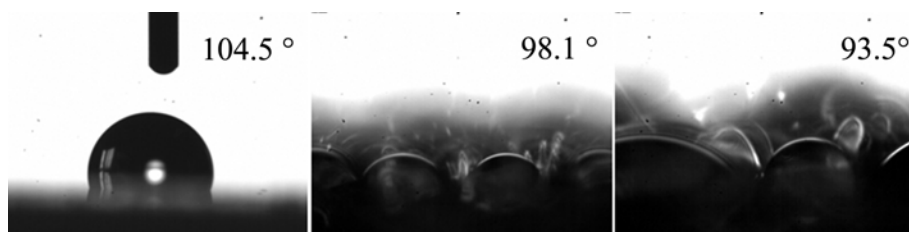

Fig. S1 profiles of a macro-droplet (3  $\mu$ l) on the hydrophobic cover glass at the room temperature (the left one) and condensed droplets on the hydrophobic cover glass at the surface temperature of -5  $^{\circ}$ C (the middle one) and -10  $^{\circ}$ C (the right one), the water CA is showed on the top-right.
